# Supplementary material for: Solid-phase microextraction and on-fiber derivatization for assessment of mammalian and vegetable milks with emphasis on the content of major phytoestrogens
Source: PubMed Central journal article supplement (PMC6484104; doi:10.1038/s41598-019-42883-7), 2019-04-25
Supplement: 41598_2019_42883_MOESM1_ESM.pdf [file 41598_2019_42883_MOESM1_ESM.pdf]

**Solid-phase microextraction and on-fiber derivatization for assessment of mammalian and vegetable milks with emphasis on the content of major phytoestrogens**

Antonella Aresta, Pietro Cotugno and Carlo Zambonin.

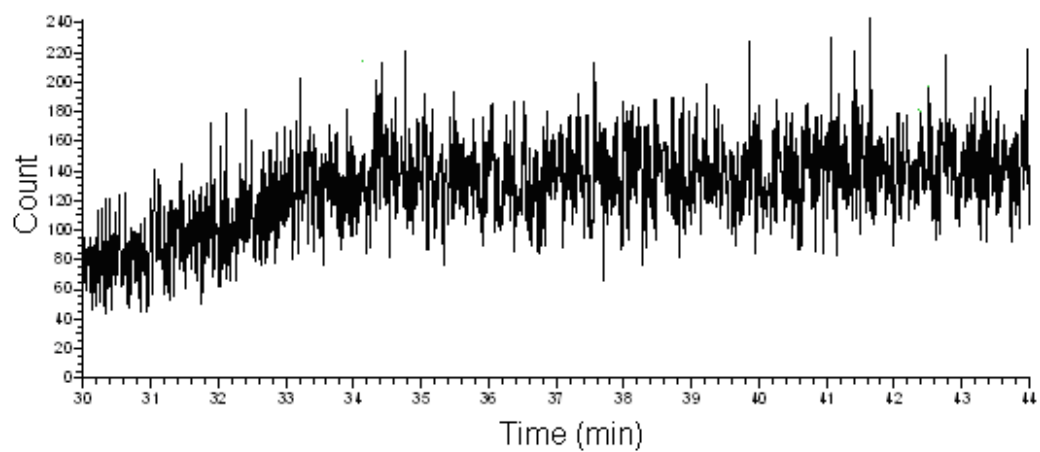

Fig 1S. GC-MS XICs (time window 29-49 min) relevant to the analysis of  $\beta$ -glucuronidase from almonds.
